# Supplementary material for: Establishment of a New Zealand White Rabbit Model for Lethal Toxin (LT) Challenge and Efficacy of Monoclonal Antibody 5E11 in the LT-Challenged Rabbit Model
Source: MDPI journal article supplement (doi:10.3390/toxins10070289), 2018-07-12
Supplement: s1 [file s1]

# Supplementary Materials: Establishment of a New Zealand White Rabbit Model for Lethal Toxin (LT) Challenge and Efficacy of Monoclonal Antibody 5E11 in the LT-challenged Rabbit Model

Duanyang Zhang, Weicen Liu, Zhonghua Wen, Bing Li, Shuling Liu, Jianmin Li, and Wei Chen

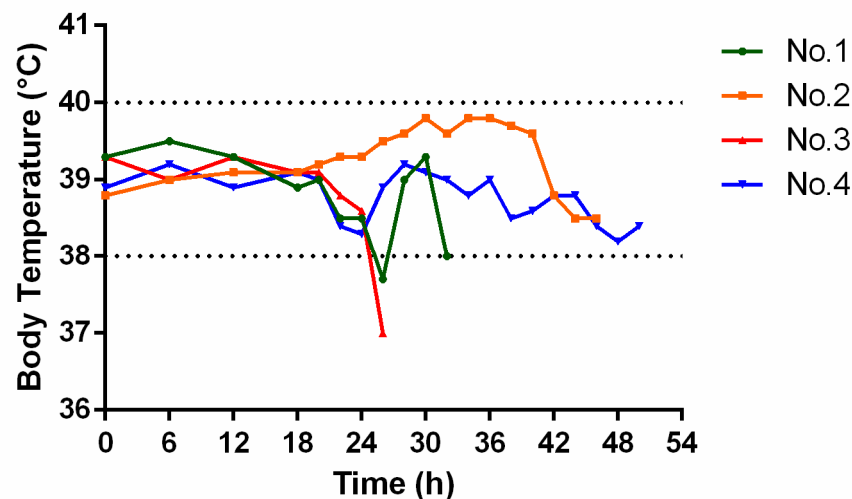

**Figure S1.** Body temperature following challenge with 4 mg PA + 2 mg LF in rabbits. The body temperature in 4 of 10 rabbits in the 4 mg PA + 2 mg LF group was measured every 6 h from 0–18 h post-challenge, and every 2 h from 18–72 h post-challenge. IPTT-300 and DAS8007 were used to detect the body temperature.

**Table S1.** Bacterial Blood Culture Results in LT-challenged rabbits\*.

| Species                      | N |
|------------------------------|---|
| <i>Escherichia coli</i>      | 3 |
| <i>Pasteurella multocida</i> | 1 |

\*Moribund, LT-challenged rabbits; n = 5 total.
